# Supplementary material
Source: MDPI journal article supplement (https://www.mdpi.com/1099-4300/25/7/1098)
Supplement: s1 [file s1]

## Flow tables referring to the gasification unit

Table S1 - Streams for gasification unit: Sugarcane bagasse

| Streams               | 1     | 2       | 3       | 4        | 5        | 6        | 7        | 8        |
|-----------------------|-------|---------|---------|----------|----------|----------|----------|----------|
| <b>Molar Fraction</b> |       |         |         |          |          |          |          |          |
| CO                    | --    | --      | --      | --       | --       | 0.184    | 0.200    | 0.263    |
| CO <sub>2</sub>       | --    | --      | --      | --       | 0.161    | 0.119    | 0.130    | 0.170    |
| H <sub>2</sub>        | --    | --      | --      | --       | --       | 0.347    | 0.378    | 0.496    |
| H <sub>2</sub> O      | --    | 1       | 1       | --       | --       | 0.299    | 0.239    | 0.002    |
| N <sub>2</sub>        | --    | --      | --      | 0.790    | 0.790    | --       | --       | --       |
| CH <sub>4</sub>       | --    | --      | --      | --       | --       | 0.049    | 0.053    | 0.069    |
| NH <sub>3</sub>       | --    | --      | --      | --       | --       | 0.002    | 0.001    | --       |
| H <sub>2</sub> S      | --    | --      | --      | --       | --       | --       | --       | --       |
| O <sub>2</sub>        | --    | --      | --      | 0.210    | 0.049    | --       | --       | --       |
| <b>Mass Fraction</b>  |       |         |         |          |          |          |          |          |
| Biomass               | 1     | --      | --      | --       | --       | --       | --       | --       |
| CO                    | --    | --      | --      | --       | --       | 0.298    | 0.326    | 0.434    |
| CO <sub>2</sub>       | --    | --      | --      | --       | 0.230    | 0.303    | 0.331    | 0.440    |
| H <sub>2</sub>        | --    | --      | --      | --       | --       | 0.040    | 0.044    | 0.059    |
| H <sub>2</sub> O      | --    | 1       | 1       | --       | --       | 0.311    | 0.249    | 0.002    |
| N <sub>2</sub>        | --    | --      | --      | 0.767    | 0.719    | --       | --       | --       |
| CH <sub>4</sub>       | --    | --      | --      | --       | --       | 0.045    | 0.049    | 0.065    |
| NH <sub>3</sub>       | --    | --      | --      | --       | --       | 0.001    | 0.001    | --       |
| H <sub>2</sub> S      | --    | --      | --      | --       | --       | --       | --       | --       |
| O <sub>2</sub>        | --    | --      | --      | 0.2329   | 0.0508   | --       | --       | --       |
| $\dot{n}$ (kmol/h)    | 0     | 314.03  | 314.03  | 962.47   | 962.47   | 1030.49  | 947.78   | 721.92   |
| $\dot{m}$ (kg/h)      | 26640 | 5657.42 | 5657.42 | 27767.68 | 29630.50 | 17832.13 | 16342.51 | 12272.90 |
| T (°C)                | 25    | 25      | 121     | 650      | 100      | 400      | 66       | 35       |
| P (bar)               | 1     | 2       | 2       | 1        | 1        | 1        | 1        | 35       |

Table S2 - Streams for gasification unit: Sewage sludge

| Streams               | 1     | 2       | 3       | 4        | 5        | 6        | 7        | 8        |
|-----------------------|-------|---------|---------|----------|----------|----------|----------|----------|
| <b>Molar Fraction</b> |       |         |         |          |          |          |          |          |
| CO                    | --    | --      | --      | --       | --       | 0.166    | 0.187    | 0.244    |
| CO <sub>2</sub>       | --    | --      | --      | --       | 0.188    | 0.087    | 0.098    | 0.128    |
| H <sub>2</sub>        | --    | --      | --      | --       | --       | 0.359    | 0.404    | 0.527    |
| H <sub>2</sub> O      | --    | 1.000   | 1.000   | --       | --       | 0.250    | 0.200    | 0.001    |
| N <sub>2</sub>        | --    | --      | --      | 0.790    | 0.790    | 0.001    | 0.002    | 0.002    |
| CH <sub>4</sub>       | --    | --      | --      | --       | --       | 0.066    | 0.075    | 0.098    |
| NH <sub>3</sub>       | --    | --      | --      | --       | --       | 0.067    | 0.032    | --       |
| H <sub>2</sub> S      | --    | --      | --      | --       | --       | 0.003    | 0.004    | --       |
| O <sub>2</sub>        | --    | --      | --      | 0.210    | 0.022    | --       | --       | --       |
| <b>Mass Fraction</b>  |       |         |         |          |          |          |          |          |
| Biomass               | 1     | --      | --      | --       | --       | --       | --       | --       |
| CO                    | --    | --      | --      | --       | --       | 0.29     | 0.33     | 0.45     |
| CO <sub>2</sub>       | --    | --      | --      | --       | 0.27     | 0.24     | 0.27     | 0.37     |
| H <sub>2</sub>        | --    | --      | --      | --       | --       | 0.05     | 0.05     | 0.07     |
| H <sub>2</sub> O      | --    | 1.00    | 1.00    | --       | --       | 0.28     | 0.23     | 0.00     |
| N <sub>2</sub>        | --    | --      | --      | 0.77     | 0.71     | 0.00     | 0.00     | 0.00     |
| CH <sub>4</sub>       | --    | --      | --      | --       | --       | 0.07     | 0.08     | 0.10     |
| NH <sub>3</sub>       | --    | --      | --      | --       | --       | 0.07     | 0.03     | --       |
| H <sub>2</sub> S      | --    | --      | --      | --       | --       | 0.01     | 0.01     | --       |
| O <sub>2</sub>        | --    | --      | --      | 0.23     | 0.02     | --       | --       | --       |
| $\dot{n}$ (kmol/h)    | --    | 331.51  | 331.51  | 1059.25  | 1059.25  | 1305.14  | 1158.55  | 887.27   |
| $\dot{m}$ (kg/h)      | 26640 | 5972.17 | 5972.17 | 30559.84 | 32948.14 | 20965.32 | 18374.35 | 13450.24 |
| T (°C)                | 25    | 25      | 121     | 650      | 100      | 400      | 62       | 35       |
| P (bar)               | 1     | 2       | 2       | 1        | 1        | 1        | 1        | 35       |

Table S3 - Streams for gasification unit: Orange Bagasse

| Streams               | 1     | 2       | 3       | 4        | 5        | 6        | 7        | 8        |
|-----------------------|-------|---------|---------|----------|----------|----------|----------|----------|
| <b>Molar Fraction</b> |       |         |         |          |          |          |          |          |
| CO                    | --    | --      | --      | --       | --       | 0.241    | 0.259    | 0.314    |
| CO <sub>2</sub>       | --    | --      | --      | --       | 0.153    | 0.117    | 0.126    | 0.153    |
| H <sub>2</sub>        | --    | --      | --      | --       | --       | 0.330    | 0.354    | 0.429    |
| H <sub>2</sub> O      | --    | 1.000   | 1.000   | --       | --       | 0.214    | 0.169    | 0.002    |
| N <sub>2</sub>        | --    | --      | --      | 0.790    | 0.790    | --       | --       | --       |
| CH <sub>4</sub>       | --    | --      | --      | --       | --       | 0.079    | 0.085    | 0.103    |
| NH <sub>3</sub>       | --    | --      | --      | --       | --       | 0.018    | 0.008    | --       |
| H <sub>2</sub> S      | --    | --      | --      | --       | --       | --       | --       | --       |
| O <sub>2</sub>        | --    | --      | --      | 0.210    | 0.057    | --       | --       | --       |
| <b>Mass Fraction</b>  |       |         |         |          |          |          |          |          |
| Biomass               | 1     | --      | --      | --       | --       | --       | --       | --       |
| CO                    | --    | --      | --      | --       | --       | 0.375    | 0.402    | 0.487    |
| CO <sub>2</sub>       | --    | --      | --      | --       | 0.219    | 0.287    | 0.307    | 0.372    |
| H <sub>2</sub>        | --    | --      | --      | --       | --       | 0.037    | 0.039    | 0.048    |
| H <sub>2</sub> O      | --    | 1.000   | 1.000   | --       | --       | 0.214    | 0.169    | 0.002    |
| N <sub>2</sub>        | --    | --      | --      | 0.767    | 0.721    | 0.001    | 0.001    | 0.001    |
| CH <sub>4</sub>       | --    | --      | --      | --       | --       | 0.070    | 0.075    | 0.091    |
| NH <sub>3</sub>       | --    | --      | --      | --       | --       | 0.017    | 0.007    | --       |
| H <sub>2</sub> S      | --    | --      | --      | --       | --       | --       | --       | --       |
| O <sub>2</sub>        | --    | --      | --      | 0.233    | 0.060    | --       | --       | --       |
| $\dot{n}$ (kmol/h)    | 0     | 368.76  | 368.76  | 1647.61  | 1647.61  | 1559.42  | 1454.77  | 1199.80  |
| $\dot{m}$ (kg/h)      | 26640 | 6643.31 | 6643.31 | 47534.25 | 50553.16 | 28126.23 | 26257.19 | 21674.77 |
| T (°C)                | 25    | 25      | 121     | 650      | 100      | 400      | 59       | 35       |
| P (bar)               | 1     | 2       | 2       | 1        | 1        | 1        | 1        | 35       |

## Flow tables referring to the syngas treatment unit for hydrogen production

Table S4 - Streams for the syngas treatment unit for hydrogen production: Sugarcane bagasse

| Streams               | 1        | 2        | 3        | 4        |
|-----------------------|----------|----------|----------|----------|
| <b>Molar Fraction</b> |          |          |          |          |
| CO                    | 0.1627   | 0.0268   | 0.0268   | 0.0017   |
| CO <sub>2</sub>       | 0.0857   | 0.2215   | 0.2215   | 0.2466   |
| H <sub>2</sub>        | 0.2490   | 0.3848   | 0.3848   | 0.4099   |
| H <sub>2</sub> O      | 0.4511   | 0.3153   | 0.3153   | 0.2902   |
| N <sub>2</sub>        | 0.0000   | 0.0000   | 0.0000   | 0.0000   |
| CH <sub>4</sub>       | 0.0515   | 0.0515   | 0.0515   | 0.0515   |
| <b>Mass Fraction</b>  |          |          |          |          |
| CO                    | 0.2562   | 0.0422   | 0.0422   | 0.0027   |
| CO <sub>2</sub>       | 0.2120   | 0.5482   | 0.5482   | 0.6103   |
| H <sub>2</sub>        | 0.0282   | 0.0436   | 0.0436   | 0.0465   |
| H <sub>2</sub> O      | 0.4570   | 0.3194   | 0.3194   | 0.2940   |
| N <sub>2</sub>        | 0.0000   | 0.0000   | 0.0000   | 0.0000   |
| CH <sub>4</sub>       | 0.0465   | 0.0465   | 0.0465   | 0.0465   |
| $\dot{n}$ (kmol/h)    | 1243.95  | 1243.95  | 1243.95  | 1243.95  |
| $\dot{m}$ (kg/h)      | 22121.30 | 22121.30 | 22121.30 | 22121.30 |
| T (°C)                | 280      | 418      | 180      | 204      |
| P (bar)               | 35       | 35       | 35       | 35       |

Table S5 - Streams for syngas treatment unit for hydrogen production: Sewage Sludge

| Streams               | 1        | 2        | 3        | 4        |
|-----------------------|----------|----------|----------|----------|
| <b>Molar Fraction</b> |          |          |          |          |
| CO                    | 0.1494   | 0.0289   | 0.0289   | 0.0024   |
| CO <sub>2</sub>       | 0.0783   | 0.1988   | 0.1988   | 0.2253   |
| H <sub>2</sub>        | 0.3234   | 0.4439   | 0.4439   | 0.4704   |
| H <sub>2</sub> O      | 0.3877   | 0.2672   | 0.2672   | 0.2407   |
| N <sub>2</sub>        | 0.0013   | 0.0013   | 0.0013   | 0.0013   |
| CH <sub>4</sub>       | 0.0599   | 0.0599   | 0.0599   | 0.0599   |
| <b>Mass Fraction</b>  |          |          |          |          |
| CO                    | 0.2574   | 0.0498   | 0.0498   | 0.0041   |
| CO <sub>2</sub>       | 0.2118   | 0.5380   | 0.5380   | 0.6097   |
| H <sub>2</sub>        | 0.0401   | 0.0550   | 0.0550   | 0.0583   |
| H <sub>2</sub> O      | 0.4295   | 0.2960   | 0.2960   | 0.2666   |
| N <sub>2</sub>        | 0.0022   | 0.0022   | 0.0022   | 0.0022   |
| CH <sub>4</sub>       | 0.0591   | 0.0591   | 0.0591   | 0.0591   |
| $\dot{n}$ (kmol/h)    | 1447.27  | 1447.27  | 1447.27  | 1447.27  |
| $\dot{m}$ (kg/h)      | 23538.79 | 23538.79 | 23538.79 | 23538.79 |
| T (°C)                | 280      | 405      | 180      | 209      |
| P (bar)               | 35       | 35       | 35       | 35       |

Table S6 - Streams for syngas treatment unit for hydrogen production: Orange Bagasse

| Streams               | 1        | 2        | 3        | 4        |
|-----------------------|----------|----------|----------|----------|
| <b>Molar Fraction</b> |          |          |          |          |
| CO                    | 0.1872   | 0.0367   | 0.0367   | 0.0047   |
| CO <sub>2</sub>       | 0.0911   | 0.2416   | 0.2416   | 0.2735   |
| H <sub>2</sub>        | 0.2557   | 0.4062   | 0.4062   | 0.4381   |
| H <sub>2</sub> O      | 0.4046   | 0.2541   | 0.2541   | 0.2221   |
| N <sub>2</sub>        | 0.0003   | 0.0003   | 0.0003   | 0.0003   |
| CH <sub>4</sub>       | 0.0612   | 0.0612   | 0.0612   | 0.0612   |
| <b>Mass Fraction</b>  |          |          |          |          |
| CO                    | 0.2906   | 0.0570   | 0.0570   | 0.0073   |
| CO <sub>2</sub>       | 0.2221   | 0.5891   | 0.5891   | 0.6671   |
| H <sub>2</sub>        | 0.0286   | 0.0454   | 0.0454   | 0.0489   |
| H <sub>2</sub> O      | 0.4039   | 0.2537   | 0.2537   | 0.2218   |
| N <sub>2</sub>        | 0.0005   | 0.0005   | 0.0005   | 0.0005   |
| CH <sub>4</sub>       | 0.0544   | 0.0544   | 0.0544   | 0.0544   |
| $\dot{n}$ (kmol/h)    | 2011.80  | 2011.80  | 2011.80  | 2011.80  |
| $\dot{m}$ (kg/h)      | 36303.17 | 36303.17 | 36303.17 | 36303.17 |
| T (°C)                | 260      | 414      | 200      | 234      |
| P (bar)               | 35       | 35       | 35       | 35       |

### Flow tables referring to the syngas treatment unit for ammonia production

Table S7 - Streams for syngas treatment unit for ammonia production - Sugarcane bagasse

| Streams               | 1       | 2       | 3        | 4        | 5        | 6        | 7        | 8        |
|-----------------------|---------|---------|----------|----------|----------|----------|----------|----------|
| <b>Molar Fraction</b> |         |         |          |          |          |          |          |          |
| CO                    | --      | --      | 0.09     | 0.052    | 0.052    | 0.004    | 0.004    | --       |
| CO <sub>2</sub>       | --      | --      | 0.047    | 0.107    | 0.107    | 0.155    | 0.155    | 0.159    |
| H <sub>2</sub>        | --      | --      | 0.138    | 0.223    | 0.223    | 0.271    | 0.271    | 0.275    |
| H <sub>2</sub> O      | --      | --      | 0.578    | 0.524    | 0.524    | 0.476    | 0.476    | 0.472    |
| N <sub>2</sub>        | 0.790   | 0.790   | 0.094    | 0.092    | 0.092    | 0.092    | 0.092    | 0.092    |
| CH <sub>4</sub>       | --      | --      | 0.028    | 0.002    | 0.002    | 0.002    | 0.002    | 0.002    |
| O <sub>2</sub>        | 0.21    | 0.21    | 0.025    | --       | --       | --       | --       | --       |
| <b>Mass Fraction</b>  |         |         |          |          |          |          |          |          |
| CO                    | --      | --      | 0.131    | 0.078    | 0.078    | 0.006    | 0.006    | 0.001    |
| CO <sub>2</sub>       | --      | --      | 0.109    | 0.253    | 0.253    | 0.365    | 0.365    | 0.374    |
| H <sub>2</sub>        | --      | --      | 0.014    | 0.024    | 0.024    | 0.029    | 0.029    | 0.03     |
| H <sub>2</sub> O      | --      | --      | 0.543    | 0.506    | 0.506    | 0.46     | 0.46     | 0.456    |
| N <sub>2</sub>        | 0.767   | 0.767   | 0.138    | 0.138    | 0.138    | 0.138    | 0.138    | 0.138    |
| CH <sub>4</sub>       | --      | --      | 0.024    | 0.002    | 0.002    | 0.002    | 0.002    | 0.002    |
| O <sub>2</sub>        | 0.233   | 0.233   | 0.042    | --       | --       | --       | --       | --       |
| $\dot{n}$ (kmol/h)    | 270.00  | 270.00  | 2253.60  | 2314.80  | 2314.80  | 2314.80  | 2314.80  | 2314.80  |
| $\dot{m}$ (kg/h)      | 7745.59 | 7745.59 | 43198.20 | 43198.20 | 43198.20 | 43198.20 | 43198.20 | 43198.20 |
| T (°C)                | 25      | 650     | 649.8    | 864.3    | 300      | 349.4    | 200      | 204      |
| P (bar)               | 1       | 35      | 20       | 35       | 35       | 35       | 35       | 35       |

Table S8 - Streams for syngas treatment unit for ammonia production - Sewage sludge

| Streams               | 1       | 2       | 3        | 4        | 5        | 6        | 7        | 8        |
|-----------------------|---------|---------|----------|----------|----------|----------|----------|----------|
| <b>Molar Fraction</b> |         |         |          |          |          |          |          |          |
| CO                    | --      | --      | 0.085    | 0.063    | 0.063    | 0.006    | 0.006    | 0.001    |
| CO <sub>2</sub>       | --      | --      | 0.045    | 0.093    | 0.093    | 0.149    | 0.149    | 0.155    |
| H <sub>2</sub>        | --      | --      | 0.184    | 0.262    | 0.262    | 0.318    | 0.318    | 0.324    |
| H <sub>2</sub> O      | --      | --      | 0.512    | 0.472    | 0.472    | 0.416    | 0.416    | 0.41     |
| N <sub>2</sub>        | 0.790   | 0.790   | 0.111    | 0.108    | 0.108    | 0.108    | 0.108    | 0.108    |
| CH <sub>4</sub>       | --      | --      | 0.034    | 0.003    | 0.003    | 0.003    | 0.003    | 0.003    |
| O <sub>2</sub>        | 0.21    | 0.21    | 0.029    | --       | --       | --       | --       | --       |
| <b>Mass Fraction</b>  |         |         |          |          |          |          |          |          |
| CO                    | --      | --      | 0.128    | 0.098    | 0.098    | 0.01     | 0.01     | 0.001    |
| CO <sub>2</sub>       | --      | --      | 0.106    | 0.228    | 0.228    | 0.366    | 0.366    | 0.38     |
| H <sub>2</sub>        | --      | --      | 0.02     | 0.029    | 0.029    | 0.036    | 0.036    | 0.036    |
| H <sub>2</sub> O      | --      | --      | 0.497    | 0.474    | 0.474    | 0.417    | 0.417    | 0.412    |
| N <sub>2</sub>        | 0.767   | 0.767   | 0.168    | 0.168    | 0.168    | 0.168    | 0.168    | 0.168    |
| CH <sub>4</sub>       | --      | --      | 0.029    | 0.002    | 0.002    | 0.002    | 0.002    | 0.002    |
| O <sub>2</sub>        | 0.233   | 0.233   | 0.051    | --       | --       | --       | --       | --       |
| $\dot{n}$ (kmol/h)    | 270.00  | 270.00  | 2253.60  | 2314.80  | 2314.80  | 2314.80  | 2314.80  | 2314.80  |
| $\dot{m}$ (kg/h)      | 7745.59 | 7745.59 | 43198.20 | 43198.20 | 43198.20 | 43198.20 | 43198.20 | 43198.20 |
| T (°C)                | 25      | 650     | 650      | 885      | 300      | 359      | 200      | 206      |
| P (bar)               | 1       | 35      | 20       | 35       | 35       | 35       | 35       | 35       |

Table S9 - Streams for syngas treatment unit for ammonia production - Orange bagasse

| Streams               | 1        | 2        | 3        | 4        | 5        | 6        | 7        | 8        |
|-----------------------|----------|----------|----------|----------|----------|----------|----------|----------|
| <b>Molar Fraction</b> |          |          |          |          |          |          |          |          |
| CO                    | --       | --       | 0.127    | 0.101    | 0.101    | 0.017    | 0.017    | 0.002    |
| CO <sub>2</sub>       | --       | --       | 0.062    | 0.116    | 0.116    | 0.2      | 0.2      | 0.215    |
| H <sub>2</sub>        | --       | --       | 0.173    | 0.266    | 0.266    | 0.35     | 0.35     | 0.365    |
| H <sub>2</sub> O      | --       | --       | 0.437    | 0.392    | 0.392    | 0.308    | 0.308    | 0.293    |
| N <sub>2</sub>        | 0.79     | 0.79     | 0.127    | 0.122    | 0.122    | 0.122    | 0.122    | 0.122    |
| CH <sub>4</sub>       | --       | --       | 0.041    | 0.004    | 0.004    | 0.004    | 0.004    | 0.004    |
| O <sub>2</sub>        | 0.21     | 0.21     | 0.034    | --       | --       | --       | --       | --       |
| <b>Mass Fraction</b>  |          |          |          |          |          |          |          |          |
| CO                    | --       | --       | 0.179    | 0.149    | 0.149    | 0.025    | 0.025    | 0.003    |
| CO <sub>2</sub>       | --       | --       | 0.137    | 0.268    | 0.268    | 0.463    | 0.463    | 0.498    |
| H <sub>2</sub>        | --       | --       | 0.018    | 0.028    | 0.028    | 0.037    | 0.037    | 0.039    |
| H <sub>2</sub> O      | --       | --       | 0.398    | 0.372    | 0.372    | 0.292    | 0.292    | 0.278    |
| N <sub>2</sub>        | 0.767    | 0.767    | 0.18     | 0.18     | 0.18     | 0.18     | 0.18     | 0.18     |
| CH <sub>4</sub>       | --       | --       | 0.034    | 0.003    | 0.003    | 0.003    | 0.003    | 0.003    |
| O <sub>2</sub>        | 0.233    | 0.233    | 0.054    | --       | --       | --       | --       | --       |
| $\dot{n}$ (kmol/h)    | 0.133    | 0.133    | 0.827    | 0.861    | 0.861    | 0.861    | 0.861    | 0.861    |
| $\dot{m}$ (kg/h)      | 13766.32 | 13766.32 | 58860.94 | 58860.94 | 58860.94 | 58860.94 | 58860.94 | 58860.94 |
| T (°C)                | 25       | 650      | 650      | 906      | 300      | 389      | 200      | 217      |
| P (bar)               | 1        | 35       | 20       | 35       | 35       | 35       | 35       | 35       |

## Flow tables referring to the syngas purification unit for ammonia production

Table S10 - Streams for syngas purification unit for ammonia production - Sugarcane bagasse

| Streams               | 1        | 2       | 3        | 4       |
|-----------------------|----------|---------|----------|---------|
| <b>Molar Fraction</b> |          |         |          |         |
| CO                    | 0.0010   | 0.0010  | --       | --      |
| CO <sub>2</sub>       | 0.3000   | 0.0060  | 0.9780   | --      |
| H <sub>2</sub>        | 0.5200   | 0.7410  | 0.0090   | 0.7338  |
| H <sub>2</sub> O      | 0.0020   | --      | 0.0060   | --      |
| N <sub>2</sub>        | 0.1730   | 0.2460  | 0.0060   | 0.2532  |
| CH <sub>4</sub>       | 0.0040   | 0.0050  | 0.0010   | 0.0130  |
| <b>Mass Fraction</b>  |          |         |          |         |
| CO                    | 0.0010   | 0.0040  | --       | --      |
| CO <sub>2</sub>       | 0.6870   | 0.0320  | 0.9930   | --      |
| H <sub>2</sub>        | 0.0550   | 0.1700  | --       | 0.1685  |
| H <sub>2</sub> O      | 0.0020   | --      | 0.0020   | --      |
| N <sub>2</sub>        | 0.2530   | 0.7850  | 0.0040   | 0.8079  |
| CH <sub>4</sub>       | 0.0030   | 0.0090  | --       | 0.0237  |
| $\dot{n}$ (kmol/h)    | 1223.62  | 853.67  | 369.96   | 828.90  |
| $\dot{m}$ (kg/h)      | 23529.75 | 7492.59 | 16037.57 | 7278.87 |
| T (°C)                | 35       | 25      | 25       | 25      |
| P (bar)               | 35       | 35      | 1        | 35      |

Table S11 - Streams for syngas purification unit for ammonia production - Sewage sludge

| Streams               | 1        | 2       | 3        | 4       |
|-----------------------|----------|---------|----------|---------|
| <b>Molar Fraction</b> |          |         |          |         |
| CO                    | 0.0010   | 0.0010  | --       | --      |
| CO <sub>2</sub>       | 0.2620   | 0.0050  | 0.9730   | --      |
| H <sub>2</sub>        | 0.5480   | 0.7410  | 0.0120   | 0.7344  |
| H <sub>2</sub> O      | 0.0020   | --      | 0.0070   | --      |
| N <sub>2</sub>        | 0.1830   | 0.2460  | 0.0080   | 0.2524  |
| CH <sub>4</sub>       | 0.0050   | 0.0060  | 0.0010   | 0.0132  |
| <b>Mass Fraction</b>  |          |         |          |         |
| CO                    | 0.0020   | 0.0050  | --       | --      |
| CO <sub>2</sub>       | 0.6450   | 0.0270  | 0.9910   | --      |
| H <sub>2</sub>        | 0.0620   | 0.1710  | 0.0010   | 0.1690  |
| H <sub>2</sub> O      | 0.0020   | --      | 0.0030   | --      |
| N <sub>2</sub>        | 0.2860   | 0.7860  | 0.0050   | 0.8068  |
| CH <sub>4</sub>       | 0.0040   | 0.0110  | --       | 0.0242  |
| $\dot{n}$ (kmol/h)    | 1552.90  | 1140.73 | 412.18   | 1110.93 |
| $\dot{m}$ (kg/h)      | 27788.08 | 9987.97 | 17800.62 | 9734.12 |
| T (°C)                | 35       | 25      | 35       | 25      |
| P (bar)               | 35       | 35      | 1        | 35      |

Table S12 - Streams for syngas purification unit for ammonia production - Orange bagasse

| Streams               | 1        | 2        | 3        | 4        |
|-----------------------|----------|----------|----------|----------|
| <b>Molar Fraction</b> |          |          |          |          |
| CO                    | 0.002    | 0.003    | --       | --       |
| CO <sub>2</sub>       | 0.303    | 0.006    | 0.978    | --       |
| H <sub>2</sub>        | 0.516    | 0.739    | 0.009    | 0.730    |
| H <sub>2</sub> O      | 0.002    | --       | 0.006    | --       |
| N <sub>2</sub>        | 0.172    | 0.245    | 0.006    | 0.253    |
| CH <sub>4</sub>       | 0.005    | 0.007    | 0.001    | 0.017    |
| <b>Mass Fraction</b>  |          |          |          |          |
| CO                    | 0.003    | 0.011    | --       | --       |
| CO <sub>2</sub>       | 0.689    | 0.029    | 0.993    | --       |
| H <sub>2</sub>        | 0.054    | 0.169    | --       | 0.166    |
| H <sub>2</sub> O      | 0.002    | 0.000    | 0.002    | --       |
| N <sub>2</sub>        | 0.248    | 0.779    | 0.004    | 0.803    |
| CH <sub>4</sub>       | 0.004    | 0.013    | --       | 0.030    |
| $\dot{n}$ (kmol/h)    | 2196.85  | 1524.72  | 672.13   | 1474.10  |
| $\dot{m}$ (kg/h)      | 42579.26 | 13439.50 | 29140.50 | 13030.00 |
| T (°C)                | 35       | 25       | 35       | 25       |
| P (bar)               | 35       | 35       | 1        | 35       |

### Flow tables referring to the syngas purification unit for hydrogen production

Table S13 - Streams for syngas purification unit for hydrogen production - sugarcane bagasse

| Streams               | 1        | 2       | 3        |
|-----------------------|----------|---------|----------|
| <b>Molar Fraction</b> |          |         |          |
| CO                    | 0.0020   | 0.0040  | --       |
| CO <sub>2</sub>       | 0.3470   | 0.0080  | 0.9770   |
| H <sub>2</sub>        | 0.5760   | 0.8820  | 0.0080   |
| H <sub>2</sub> O      | 0.0020   | --      | 0.0050   |
| N <sub>2</sub>        | --       | --      | --       |
| CH <sub>4</sub>       | 0.0720   | 0.1060  | 0.0100   |
| <b>Mass Fraction</b>  |          |         |          |
| CO                    | 0.0040   | 0.0260  | --       |
| CO <sub>2</sub>       | 0.8630   | 0.0900  | 0.9940   |
| H <sub>2</sub>        | 0.0660   | 0.4520  | 0.0000   |
| H <sub>2</sub> O      | 0.0020   | --      | 0.0020   |
| N <sub>2</sub>        | --       | --      | --       |
| CH <sub>4</sub>       | 0.0660   | 0.4320  | 0.0040   |
| $\dot{n}$ (kmol/h)    | 885.60   | 576.00  | 309.60   |
| $\dot{m}$ (kg/h)      | 15643.65 | 2265.36 | 13378.60 |
| T (°C)                | 35       | 25      | 35       |
| P (bar)               | 35       | 35      | 1        |

Table S14 - Streams for syngas purification unit for hydrogen production - sewage sludge

| <b>Streams</b>        | <b>1</b> | <b>2</b> | <b>3</b> |
|-----------------------|----------|----------|----------|
| <b>Molar Fraction</b> |          |          |          |
| CO                    | 0.0030   | 0.0040   | --       |
| CO <sub>2</sub>       | 0.2960   | 0.0070   | 0.9700   |
| H <sub>2</sub>        | 0.6180   | 0.8790   | 0.0110   |
| H <sub>2</sub> O      | 0.0020   | --       | 0.0060   |
| N <sub>2</sub>        | 0.0020   | 0.0020   | --       |
| CH <sub>4</sub>       | 0.0790   | 0.1070   | 0.0130   |
| <b>Mass Fraction</b>  |          |          |          |
| CO                    | 0.0060   | 0.0310   | --       |
| CO <sub>2</sub>       | 0.8300   | 0.0820   | 0.9920   |
| H <sub>2</sub>        | 0.0790   | 0.4420   | 0.0010   |
| H <sub>2</sub> O      | 0.0020   | --       | 0.0020   |
| N <sub>2</sub>        | 0.0030   | 0.0160   | --       |
| CH <sub>4</sub>       | 0.0800   | 0.4280   | 0.0050   |
| $\dot{n}$ (kmol/h)    | 1101.60  | 770.40   | 331.20   |
| $\dot{m}$ (kg/h)      | 17296.37 | 3086.23  | 14210.50 |
| T (°C)                | 35       | 25       | 35       |
| P (bar)               | 35       | 35       | 1        |

Table S15 - Streams for syngas purification unit for hydrogen production - Orange bagasse

| <b>Streams</b>        | <b>1</b> | <b>2</b> | <b>3</b> |
|-----------------------|----------|----------|----------|
| <b>Molar Fraction</b> |          |          |          |
| CO                    | 0.0060   | 0.0090   | --       |
| CO <sub>2</sub>       | 0.3510   | 0.0090   | 0.9770   |
| H <sub>2</sub>        | 0.5620   | 0.8650   | 0.0070   |
| H <sub>2</sub> O      | 0.0020   | --       | 0.0050   |
| N <sub>2</sub>        | --       | 0.0010   | --       |
| CH <sub>4</sub>       | 0.0790   | 0.1160   | 0.0110   |
| <b>Mass Fraction</b>  |          |          |          |
| CO                    | 0.0090   | 0.0600   | --       |
| CO <sub>2</sub>       | 0.8560   | 0.0950   | 0.9930   |
| H <sub>2</sub>        | 0.0630   | 0.4070   | --       |
| H <sub>2</sub> O      | 0.0020   | --       | 0.0020   |
| N <sub>2</sub>        | 0.0010   | 0.0040   | --       |
| CH <sub>4</sub>       | 0.0700   | 0.4330   | 0.0040   |
| $\dot{n}$ (kmol/h)    | 1567.68  | 1013.95  | 553.73   |
| $\dot{m}$ (kg/h)      | 28300.45 | 4343.35  | 23957.64 |
| T (°C)                | 35       | 25       | 35       |
| P (bar)               | 35       | 35       | 1        |



## Flow tables referring to the hydrogen production unit

Table S16 - Streams for hydrogen production unit - Sugarcane Bagasse

| Streams               | 1       | 2      | 3       | 4        | 5      |
|-----------------------|---------|--------|---------|----------|--------|
| <b>Molar Fraction</b> |         |        |         |          |        |
| CO                    | 0.0037  | --     | 0.0227  | 0.0001   | --     |
| CO <sub>2</sub>       | 0.0080  | --     | 0.0495  | 0.0650   | --     |
| H <sub>2</sub>        | 0.8821  | 1.0000 | 0.2723  | --       | 1.0000 |
| H <sub>2</sub> O      | --      | --     | 0.0002  | 0.1415   | --     |
| N <sub>2</sub>        | 0.0001  | --     | 0.0003  | 0.7298   | --     |
| CH <sub>4</sub>       | 0.1061  | --     | 0.6550  | --       | --     |
| O <sub>2</sub>        | 0.0000  | --     | --      | 0.0637   | --     |
| <b>Mass Fraction</b>  |         |        |         |          |        |
| CO                    | 0.0262  | --     | 0.0459  | 0.0001   | --     |
| CO <sub>2</sub>       | 0.0895  | --     | 0.1568  | 0.1025   | --     |
| H <sub>2</sub>        | 0.4516  | 1.0000 | 0.0395  | --       | 1.0000 |
| H <sub>2</sub> O      | 0.0002  | --     | 0.0003  | 0.0914   | --     |
| N <sub>2</sub>        | 0.0004  | --     | 0.0007  | 0.7330   | --     |
| CH <sub>4</sub>       | 0.4322  | --     | 0.7569  | --       | --     |
| O <sub>2</sub>        | --      | --     | --      | 0.0731   | --     |
| $\dot{n}$ (kmol/h)    | 575.25  | 482.07 | 93.18   | 1041.88  | 482.07 |
| $\dot{m}$ (kg/h)      | 2265.36 | 971.81 | 1293.55 | 29059.61 | 971.81 |
| T (°C)                | 26      | 26     | 26      | 100      | 35     |
| P (bar)               | 35      | 35     | 1       | 1        | 200    |

Table S17 - Streams for hydrogen production unit - Sewage Sludge

| Streams               | 1       | 2       | 3       | 4        | 5       |
|-----------------------|---------|---------|---------|----------|---------|
| <b>Molar Fraction</b> |         |         |         |          |         |
| CO                    | 0.0044  | --      | 0.0267  | 0.0001   | --      |
| CO <sub>2</sub>       | 0.0075  | --      | 0.0452  | 0.0650   | --      |
| H <sub>2</sub>        | 0.8789  | 1.0000  | 0.2662  | --       | 1.0000  |
| H <sub>2</sub> O      | --      | --      | 0.0002  | 0.1412   | --      |
| N <sub>2</sub>        | 0.0024  | --      | 0.0142  | 0.7303   | --      |
| CH <sub>4</sub>       | 0.1069  | --      | 0.6475  | --       | --      |
| O <sub>2</sub>        | --      | --      | --      | 0.0634   | --      |
| <b>Mass Fraction</b>  |         |         |         |          |         |
| CO                    | 0.0308  | --      | 0.0531  | 0.0001   | --      |
| CO <sub>2</sub>       | 0.0820  | --      | 0.1415  | 0.1026   | --      |
| H <sub>2</sub>        | 0.4424  | 1.0000  | 0.0382  | --       | 1.0000  |
| H <sub>2</sub> O      | 0.0002  | --      | 0.0003  | 0.0912   | --      |
| N <sub>2</sub>        | 0.0164  | --      | 0.0284  | 0.7334   | --      |
| CH <sub>4</sub>       | 0.4282  | --      | 0.7386  | --       | --      |
| O <sub>2</sub>        | --      | --      | --      | 0.0727   | --      |
| $\dot{n}$ (kmol/h)    | 770.65  | 643.42  | 127.22  | 1406.39  | 643.42  |
| $\dot{m}$ (kg/h)      | 3086.30 | 1297.07 | 1789.23 | 39229.81 | 1297.07 |
| T (°C)                | 26      | 26      | 26      | 100      | 35      |
| P (bar)               | 35      | 35      | 1       | 1        | 200     |

Table S18 - Streams for hydrogen production unit - Orange bagasse

| Streams               | 1       | 2       | 3       | 4        | 5       |
|-----------------------|---------|---------|---------|----------|---------|
| <b>Molar Fraction</b> |         |         |         |          |         |
| CO                    | 0.0092  | --      | 0.0519  | 0.0001   | --      |
| CO <sub>2</sub>       | 0.0093  | --      | 0.0521  | 0.0684   | --      |
| H <sub>2</sub>        | 0.8652  | 1.0000  | 0.2430  | --       | 1.0000  |
| H <sub>2</sub> O      | --      | --      | 0.0002  | 0.1402   | --      |
| N <sub>2</sub>        | 0.0006  | --      | 0.0032  | 0.7290   | --      |
| CH <sub>4</sub>       | 0.1156  | --      | 0.6495  | --       | --      |
| O <sub>2</sub>        | --      | --      | --      | 0.0622   | --      |
| <b>Mass Fraction</b>  |         |         |         |          |         |
| CO                    | 0.0605  | --      | 0.0986  | 0.0001   | --      |
| CO <sub>2</sub>       | 0.0953  | --      | 0.1555  | 0.1077   | --      |
| H <sub>2</sub>        | 0.4072  | 1.0000  | 0.0332  | --       | 1.0000  |
| H <sub>2</sub> O      | 0.0001  | --      | 0.0002  | 0.0904   | --      |
| N <sub>2</sub>        | 0.0038  | --      | 0.0061  | 0.7306   | --      |
| CH <sub>4</sub>       | 0.4331  | --      | 0.7063  | --       | --      |
| O <sub>2</sub>        | --      | --      | --      | 0.0713   | --      |
| $\dot{n}$ (kmol/h)    | 1013.95 | 833.43  | 180.53  | 1985.79  | 833.43  |
| $\dot{m}$ (kg/h)      | 4343.34 | 1680.09 | 2663.26 | 55511.77 | 1680.09 |
| T (°C)                | 26      | 26      | 26      | 100      | 35      |
| P (bar)               | 35      | 35      | 1       | 1        | 200     |

### Flow tables referring to the ammonia production unit

Table S19 - Streams for ammonia production unit - Sugarcane Bagasse

[illegible]

Table S20 - Streams for ammonia production unit - Sewage sludge

[illegible]

Table S21 - Streams for ammonia production unit - Orange bagasse

[illegible]
